# Supplementary material
Source: PubMed Central journal article supplement (PMC3707630)
Supplement: NIHMS317281-supplement-MIF_signaling_2006_supplement.pdf [file NIHMS317281-supplement-MIF_signaling_2006_supplement.pdf]

## Supplemental Data

### CD44 Is the Signaling Component of the Macrophage

#### Migration Inhibitory Factor-CD74 Receptor Complex

Xuerong Shi, Lin Leng, Tian Wang, Wenkui Wang, Xin Du, Ji Li, Courtney McDonald, Zun Chen, James W. Murphy, Elias Lolis, Paul Noble, Warren Knudson, and Richard Bucala

#### Supplemental Reference

Mitchell, R.A., Metz, C.N., Peng, T., and Bucala, R. (1999). Sustained mitogen-activated protein kinase (MAPK) and cytoplasmic phospholipase A2 activation by macrophage migration inhibitory factor (MIF). Regulatory role in cell proliferation and glucocorticoid action. *J. Biol. Chem.* 274, 18100–18106.

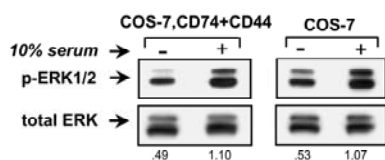

**Figure S1.** COS-7/M6 Parental Cells Do Not Differ Significantly from COS-7/M6 Cells Stably Transfected with CD74 and CD44 in ERK Responsiveness to Non-MIF Stimuli  
Serum induced ERK1/2 phosphorylation was performed as described (Mitchell et al., 1999).

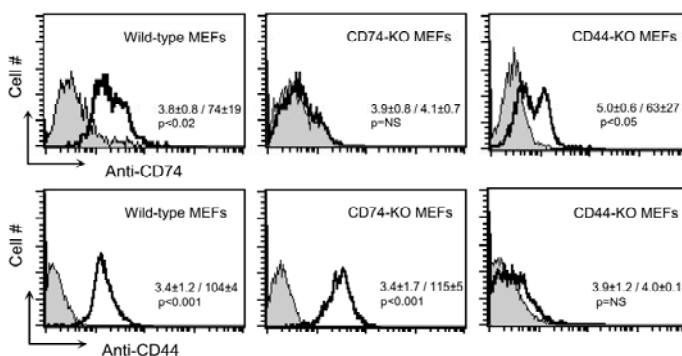

**Figure S2.** Murine Embryonic Fibroblasts from Wild-Type Mice, but Not CD-74-KO or CD44-KO Mice, Express Cell-Surface CD74 and CD44

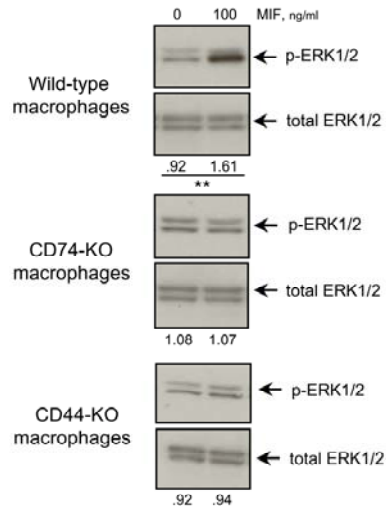

**Figure S3.** ERK Phosphorylation in Primary Peritoneal Macrophages Stimulated with Murine MIF for 10 Mins

Performed as described (Mitchell et al., 1999).
